# Supplementary material for: Pleistocene reefs of the Egyptian Red Sea: environmental change and community persistence
Source: PeerJ. 2017 Jun 28;5:e3504. doi: 10.7717/peerj.3504 (PMC5493035; doi:10.7717/peerj.3504)
Supplement: Supplemental Information 1 — A listing of all the specimens collected from the Pleistocene reefs of Egypt during field work for this study. [file peerj-05-3504-s001.xlsx]

## Sheet: Sheet1
UCMP Specimen #	Class	Genus species	Age	UCMP Locality ID#	Locality Name	Country
557184	Anthozoa	Porites	Late Pleistocene	IP1347	Wadi Wizr, Terrace 1	Egypt
557185	Anthozoa	Galaxia fascicularis	Late Pleistocene	IP1347	Wadi Wizr, Terrace 1	Egypt
557186	Anthozoa	Echinopora lamellosa	Late Pleistocene	IP1347	Wadi Wizr, Terrace 1	Egypt
557187	Anthozoa	Goniastrea stelligera	Late Pleistocene	IP1347	Wadi Wizr, Terrace 1	Egypt
557188	Anthozoa	Lobophyllia hemprichii	Late Pleistocene	IP1348	Wadi Wizr, Terrace 2	Egypt
557189	Anthozoa	Lobophyllia hemprichii	Late Pleistocene	IP1348	Wadi Wizr, Terrace 2	Egypt
557190	Anthozoa	Favites micropentagona	Middle Pleistocene	IP1352	Wadi Gassus, Terrace 3	Egypt
557191	Anthozoa	Goniastrea stelligera	Middle Pleistocene	IP1349	Wadi Wizr, Terrace 3	Egypt
557192	Anthozoa	Goniastrea stelligera	Middle Pleistocene	IP1349	Wadi Wizr, Terrace 3	Egypt
557193	Anthozoa	Goniastrea stelligera	Middle Pleistocene	IP1349	Wadi Wizr, Terrace 3	Egypt
557194	Anthozoa	Goniastrea stelligera	Middle Pleistocene	IP1349	Wadi Wizr, Terrace 3	Egypt
557195	Anthozoa	Leptoria phrygia	Middle Pleistocene	IP1349	Wadi Wizr, Terrace 3	Egypt
557196	Anthozoa	Echinopora lamellosa	Middle Pleistocene	IP1349	Wadi Wizr, Terrace 3	Egypt
557197	Anthozoa	Echinopora gemmacea	Middle Pleistocene	IP1349	Wadi Wizr, Terrace 3	Egypt
557198	Anthozoa	Porites	Middle Pleistocene	IP1349	Wadi Wizr, Terrace 3	Egypt
557199	Anthozoa	Porites	Middle Pleistocene	IP1349	Wadi Wizr, Terrace 3	Egypt
557200	Anthozoa	Porites	Middle Pleistocene	IP1349	Wadi Wizr, Terrace 3	Egypt
557201	Anthozoa	Porites	Middle Pleistocene	IP1349	Wadi Wizr, Terrace 3	Egypt
557202	Anthozoa	Porites	Middle Pleistocene	IP1349	Wadi Wizr, Terrace 3	Egypt
557203	Anthozoa	Porites	Middle Pleistocene	IP1349	Wadi Wizr, Terrace 3	Egypt
557204	Anthozoa		Middle Pleistocene	IP1349	Wadi Wizr, Terrace 3	Egypt
557205	Anthozoa		Middle Pleistocene	IP1349	Wadi Wizr, Terrace 3	Egypt
557206	Anthozoa		Middle Pleistocene	IP1349	Wadi Wizr, Terrace 3	Egypt
557207	Anthozoa	Favites pentagona	Late Pleistocene	IP1350	Wadi Gassus, Terrace 1	Egypt
557208	Anthozoa	Favites pentagona	Late Pleistocene	IP1350	Wadi Gassus, Terrace 1	Egypt
557209	Anthozoa	Favites pentagona	Late Pleistocene	IP1350	Wadi Gassus, Terrace 1	Egypt
557210	Anthozoa	Favites pentagona	Late Pleistocene	IP1350	Wadi Gassus, Terrace 1	Egypt
557211	Anthozoa	Echinopora gemmacea	Late Pleistocene	IP1350	Wadi Gassus, Terrace 1	Egypt
557212	Anthozoa	Echinopora lamellosa	Late Pleistocene	IP1350	Wadi Gassus, Terrace 1	Egypt
557213	Anthozoa	Echinopora lamellosa	Late Pleistocene	IP1350	Wadi Gassus, Terrace 1	Egypt
557214	Anthozoa	Echinopora lamellosa	Late Pleistocene	IP1350	Wadi Gassus, Terrace 1	Egypt
557215	Anthozoa	Goniastrea stelligera	Late Pleistocene	IP1350	Wadi Gassus, Terrace 1	Egypt
557216	Anthozoa	Goniastrea stelligera	Late Pleistocene	IP1350	Wadi Gassus, Terrace 1	Egypt
557217	Anthozoa	Galaxea fascicularis	Late Pleistocene	IP1350	Wadi Gassus, Terrace 1	Egypt
557218	Anthozoa	Dipsastraea speciosa	Late Pleistocene	IP1350	Wadi Gassus, Terrace 1	Egypt
557219	Anthozoa	Goniopora savignyi	Late Pleistocene	IP1350	Wadi Gassus, Terrace 1	Egypt
557220	Anthozoa	Porites	Late Pleistocene	IP1350	Wadi Gassus, Terrace 1	Egypt
557221	Anthozoa	Porites	Late Pleistocene	IP1350	Wadi Gassus, Terrace 1	Egypt
557222	Anthozoa	Porites	Late Pleistocene	IP1350	Wadi Gassus, Terrace 1	Egypt
557223	Anthozoa	Porites	Late Pleistocene	IP1350	Wadi Gassus, Terrace 1	Egypt
557224	Anthozoa	Pocillopora damicornis	Late Pleistocene	IP1350	Wadi Gassus, Terrace 1	Egypt
557225	Anthozoa	Cyphastrea microphthalma	Late Pleistocene	IP1350	Wadi Gassus, Terrace 1	Egypt
557226	Anthozoa	Cyphastrea microphthalma	Late Pleistocene	IP1350	Wadi Gassus, Terrace 1	Egypt
557227	Anthozoa	Platygyra daedalea	Late Pleistocene	IP1350	Wadi Gassus, Terrace 1	Egypt
557228	Anthozoa	Leptastrea bottae	Late Pleistocene	IP1350	Wadi Gassus, Terrace 1	Egypt
557229	Anthozoa		Late Pleistocene	IP1350	Wadi Gassus, Terrace 1	Egypt
557230	Anthozoa	Platygyra lamellina	Late Pleistocene	IP1350	Wadi Gassus, Terrace 1	Egypt
557231	Anthozoa	Favites abdita	Late Pleistocene	IP1351	Wadi Gassus, Terrace 2	Egypt
557232	Anthozoa	Leptastrea bottae	Late Pleistocene	IP1351	Wadi Gassus, Terrace 2	Egypt
557233	Anthozoa	Favites pentagona	Late Pleistocene	IP1351	Wadi Gassus, Terrace 2	Egypt
557234	Anthozoa	Goniastrea stelligera	Late Pleistocene	IP1351	Wadi Gassus, Terrace 2	Egypt
557235	Anthozoa	Porites	Late Pleistocene	IP1351	Wadi Gassus, Terrace 2	Egypt
557236	Anthozoa	Cyphastrea microphthalma	Late Pleistocene	IP1351	Wadi Gassus, Terrace 2	Egypt
557237	Anthozoa	Galaxea fascicularis	Late Pleistocene	IP1351	Wadi Gassus, Terrace 2	Egypt
557238	Anthozoa	Favites	Late Pleistocene	IP1351	Wadi Gassus, Terrace 2	Egypt
557239	Anthozoa	Favites micropentagona	Middle Pleistocene	IP1352	Wadi Gassus, Terrace 3	Egypt
557240	Anthozoa	Acropora	Late Pleistocene	IP1351	Wadi Gassus, Terrace 2	Egypt
557241	Anthozoa	Porites	Middle Pleistocene	IP1352	Wadi Gassus, Terrace 3	Egypt
557242	Anthozoa	Porites	Middle Pleistocene	IP1352	Wadi Gassus, Terrace 3	Egypt
557243	Anthozoa	Porites	Middle Pleistocene	IP1352	Wadi Gassus, Terrace 3	Egypt
557244	Anthozoa	Porites	Middle Pleistocene	IP1352	Wadi Gassus, Terrace 3	Egypt
557245	Anthozoa	Cyphastrea microphthalma	Middle Pleistocene	IP1352	Wadi Gassus, Terrace 3	Egypt
557246	Anthozoa	Platygyra lamellina	Middle Pleistocene	IP1352	Wadi Gassus, Terrace 3	Egypt
557247	Anthozoa	Dipsastraea speciosa	Middle Pleistocene	IP1352	Wadi Gassus, Terrace 3	Egypt
557248	Anthozoa	Dipsastraea pallida	Middle Pleistocene	IP1352	Wadi Gassus, Terrace 3	Egypt
557249	Anthozoa		Middle Pleistocene	IP1352	Wadi Gassus, Terrace 3	Egypt
557250	Anthozoa	Porites	Middle Pleistocene	IP1354	Sharm El Arab, Terrace 3	Egypt
557251	Anthozoa	Porites	Middle Pleistocene	IP1354	Sharm El Arab, Terrace 3	Egypt
557252	Anthozoa		Middle Pleistocene	IP1354	Sharm El Arab, Terrace 3	Egypt
557253	Anthozoa		Middle Pleistocene	IP1354	Sharm El Arab, Terrace 3	Egypt
557273	Crustacea		Middle Pleistocene	IP1352	Wadi Gassus, Terrace 3	Egypt
557274	Crustacea		Middle Pleistocene	IP1352	Wadi Gassus, Terrace 3	Egypt
557275	Bivalvia	Hyotissa	Middle Pleistocene	IP1352	Wadi Gassus, Terrace 3	Egypt
557276	Gastropoda		Middle Pleistocene	IP1352	Wadi Gassus, Terrace 3	Egypt
557277	Gastropoda	Turbo radiatus	Middle Pleistocene	IP1352	Wadi Gassus, Terrace 3	Egypt
557278	Gastropoda	Nerita quadricolor	Middle Pleistocene	IP1352	Wadi Gassus, Terrace 3	Egypt
557279	Gastropoda	Nerita	Middle Pleistocene	IP1352	Wadi Gassus, Terrace 3	Egypt
557280	Gastropoda	Volema paradisiaca	Middle Pleistocene	IP1352	Wadi Gassus, Terrace 3	Egypt
557281	Gastropoda	Mammilla melanostoma	Middle Pleistocene	IP1352	Wadi Gassus, Terrace 3	Egypt
557282	Gastropoda	Nerita	Middle Pleistocene	IP1352	Wadi Gassus, Terrace 3	Egypt
557283	Gastropoda	Bursa granularis	Middle Pleistocene	IP1352	Wadi Gassus, Terrace 3	Egypt
557284	Gastropoda	Polinices mammilla	Middle Pleistocene	IP1352	Wadi Gassus, Terrace 3	Egypt
557285	Gastropoda	Malea pomum	Middle Pleistocene	IP1352	Wadi Gassus, Terrace 3	Egypt
557286	Gastropoda	Chicoreus	Middle Pleistocene	IP1352	Wadi Gassus, Terrace 3	Egypt
557287	Gastropoda		Middle Pleistocene	IP1352	Wadi Gassus, Terrace 3	Egypt
557288	Bivalvia	Tridacna	Middle Pleistocene	IP1352	Wadi Gassus, Terrace 3	Egypt
557289	Anthozoa		Late Pleistocene	IP1353	Sharm El Arab, Terrace 1	Egypt
557290	Gastropoda		Late Pleistocene	IP1351	Wadi Gassus, Terrace 2	Egypt
557291			Late Pleistocene	IP1351	Wadi Gassus, Terrace 2	Egypt
557292	Echinoidea		Late Pleistocene	IP1351	Wadi Gassus, Terrace 2	Egypt
557293	Anthozoa		Late Pleistocene	IP1351	Wadi Gassus, Terrace 2	Egypt
557294	Bivalvia		Late Pleistocene	IP1351	Wadi Gassus, Terrace 2	Egypt
557295	Bivalvia	Spondylus	Late Pleistocene	IP1351	Wadi Gassus, Terrace 2	Egypt
557296	Bivalvia	Spondylus	Late Pleistocene	IP1351	Wadi Gassus, Terrace 2	Egypt
557297	Bivalvia		Late Pleistocene	IP1351	Wadi Gassus, Terrace 2	Egypt
557298	Bivalvia		Late Pleistocene	IP1351	Wadi Gassus, Terrace 2	Egypt
557299	Bivalvia		Late Pleistocene	IP1351	Wadi Gassus, Terrace 2	Egypt
557300	Bivalvia		Late Pleistocene	IP1351	Wadi Gassus, Terrace 2	Egypt
557301	Bivalvia		Late Pleistocene	IP1351	Wadi Gassus, Terrace 2	Egypt
557302	Bivalvia		Late Pleistocene	IP1351	Wadi Gassus, Terrace 2	Egypt
557303	Bivalvia		Late Pleistocene	IP1351	Wadi Gassus, Terrace 2	Egypt
557304	Bivalvia		Late Pleistocene	IP1351	Wadi Gassus, Terrace 2	Egypt
557305	Gastropoda	Turbo radiatus	Late Pleistocene	IP1351	Wadi Gassus, Terrace 2	Egypt
557306	Gastropoda		Late Pleistocene	IP1351	Wadi Gassus, Terrace 2	Egypt
557307	Gastropoda		Late Pleistocene	IP1351	Wadi Gassus, Terrace 2	Egypt
557308	Gastropoda		Late Pleistocene	IP1351	Wadi Gassus, Terrace 2	Egypt
557309	Gastropoda		Late Pleistocene	IP1351	Wadi Gassus, Terrace 2	Egypt
557310	Gastropoda		Late Pleistocene	IP1351	Wadi Gassus, Terrace 2	Egypt
557311	Anthozoa		Late Pleistocene	IP1350	Wadi Gassus, Terrace 1	Egypt
557312			Late Pleistocene	IP1350	Wadi Gassus, Terrace 1	Egypt
557313	Echinoidea		Late Pleistocene	IP1350	Wadi Gassus, Terrace 1	Egypt
557314	Echinoidea		Late Pleistocene	IP1350	Wadi Gassus, Terrace 1	Egypt
557315	Bivalvia		Late Pleistocene	IP1350	Wadi Gassus, Terrace 1	Egypt
557316	Bivalvia	Spondylus	Late Pleistocene	IP1350	Wadi Gassus, Terrace 1	Egypt
557317	Bivalvia	Spondylus	Late Pleistocene	IP1350	Wadi Gassus, Terrace 1	Egypt
557318	Bivalvia		Late Pleistocene	IP1350	Wadi Gassus, Terrace 1	Egypt
557319	Bivalvia		Late Pleistocene	IP1350	Wadi Gassus, Terrace 1	Egypt
557320	Bivalvia		Late Pleistocene	IP1350	Wadi Gassus, Terrace 1	Egypt
557321	Bivalvia		Late Pleistocene	IP1350	Wadi Gassus, Terrace 1	Egypt
557322	Bivalvia		Late Pleistocene	IP1350	Wadi Gassus, Terrace 1	Egypt
557323	Bivalvia		Late Pleistocene	IP1350	Wadi Gassus, Terrace 1	Egypt
557324	Bivalvia		Late Pleistocene	IP1350	Wadi Gassus, Terrace 1	Egypt
557325	Bivalvia		Late Pleistocene	IP1350	Wadi Gassus, Terrace 1	Egypt
557326	Bivalvia	Tridacna	Late Pleistocene	IP1350	Wadi Gassus, Terrace 1	Egypt
557327	Bivalvia	Tridacna	Late Pleistocene	IP1350	Wadi Gassus, Terrace 1	Egypt
557328	Bivalvia	Tridacna	Late Pleistocene	IP1350	Wadi Gassus, Terrace 1	Egypt
557329	Bivalvia	Tridacna	Late Pleistocene	IP1350	Wadi Gassus, Terrace 1	Egypt
557330	Bivalvia	Tridacna	Late Pleistocene	IP1350	Wadi Gassus, Terrace 1	Egypt
557331	Bivalvia	Tridacna	Late Pleistocene	IP1350	Wadi Gassus, Terrace 1	Egypt
557332	Bivalvia	Tridacna	Late Pleistocene	IP1350	Wadi Gassus, Terrace 1	Egypt
557333	Bivalvia	Tridacna	Late Pleistocene	IP1350	Wadi Gassus, Terrace 1	Egypt
557334	Bivalvia	Tridacna	Late Pleistocene	IP1350	Wadi Gassus, Terrace 1	Egypt
557335	Gastropoda		Late Pleistocene	IP1350	Wadi Gassus, Terrace 1	Egypt
557336	Gastropoda		Late Pleistocene	IP1350	Wadi Gassus, Terrace 1	Egypt
557337	Gastropoda		Late Pleistocene	IP1350	Wadi Gassus, Terrace 1	Egypt
557338	Gastropoda		Late Pleistocene	IP1350	Wadi Gassus, Terrace 1	Egypt
557339	Gastropoda		Late Pleistocene	IP1350	Wadi Gassus, Terrace 1	Egypt
557340	Gastropoda		Late Pleistocene	IP1350	Wadi Gassus, Terrace 1	Egypt
557341	Gastropoda		Late Pleistocene	IP1350	Wadi Gassus, Terrace 1	Egypt
557342	Gastropoda	Turbo radiatus	Late Pleistocene	IP1350	Wadi Gassus, Terrace 1	Egypt
557343	Anthozoa		Late Pleistocene	IP1347	Wadi Wizr, Terrace 1	Egypt
557344	Echinoidea		Late Pleistocene	IP1347	Wadi Wizr, Terrace 1	Egypt
557345	Bivalvia	Hyotissa	Late Pleistocene	IP1347	Wadi Wizr, Terrace 1	Egypt
557346	Bivalvia	Spondylus	Late Pleistocene	IP1347	Wadi Wizr, Terrace 1	Egypt
557347	Bivalvia		Late Pleistocene	IP1347	Wadi Wizr, Terrace 1	Egypt
557348	Bivalvia		Late Pleistocene	IP1347	Wadi Wizr, Terrace 1	Egypt
557349	Bivalvia		Late Pleistocene	IP1347	Wadi Wizr, Terrace 1	Egypt
557350	Bivalvia		Late Pleistocene	IP1347	Wadi Wizr, Terrace 1	Egypt
557351	Bivalvia		Late Pleistocene	IP1347	Wadi Wizr, Terrace 1	Egypt
557352	Bivalvia		Late Pleistocene	IP1347	Wadi Wizr, Terrace 1	Egypt
557353	Bivalvia		Late Pleistocene	IP1347	Wadi Wizr, Terrace 1	Egypt
557354	Bivalvia		Late Pleistocene	IP1347	Wadi Wizr, Terrace 1	Egypt
557355	Bivalvia		Late Pleistocene	IP1347	Wadi Wizr, Terrace 1	Egypt
557356	Bivalvia		Late Pleistocene	IP1347	Wadi Wizr, Terrace 1	Egypt
557357	Bivalvia		Late Pleistocene	IP1347	Wadi Wizr, Terrace 1	Egypt
557358	Bivalvia		Late Pleistocene	IP1347	Wadi Wizr, Terrace 1	Egypt
557359	Gastropoda		Late Pleistocene	IP1347	Wadi Wizr, Terrace 1	Egypt
557360	Gastropoda		Late Pleistocene	IP1347	Wadi Wizr, Terrace 1	Egypt
557361	Gastropoda	Gibberulus gibberulus	Late Pleistocene	IP1347	Wadi Wizr, Terrace 1	Egypt
557362	Gastropoda		Late Pleistocene	IP1347	Wadi Wizr, Terrace 1	Egypt
557363	Gastropoda		Late Pleistocene	IP1347	Wadi Wizr, Terrace 1	Egypt
557364	Gastropoda	Cypraea	Late Pleistocene	IP1347	Wadi Wizr, Terrace 1	Egypt
557365	Gastropoda	Cerithium	Late Pleistocene	IP1347	Wadi Wizr, Terrace 1	Egypt
557366	Gastropoda	Turbo Radiatus	Late Pleistocene	IP1347	Wadi Wizr, Terrace 1	Egypt
557367	Gastropoda		Late Pleistocene	IP1347	Wadi Wizr, Terrace 1	Egypt
557368	Gastropoda		Late Pleistocene	IP1347	Wadi Wizr, Terrace 1	Egypt
557369	Gastropoda		Late Pleistocene	IP1347	Wadi Wizr, Terrace 1	Egypt
557370	Gastropoda		Late Pleistocene	IP1347	Wadi Wizr, Terrace 1	Egypt
557371	Gastropoda	Neritopsis	Late Pleistocene	IP1347	Wadi Wizr, Terrace 1	Egypt
557372	Gastropoda	Canarium mutabile	Late Pleistocene	IP1347	Wadi Wizr, Terrace 1	Egypt
557373	Gastropoda		Late Pleistocene	IP1347	Wadi Wizr, Terrace 1	Egypt
557374	Gastropoda	Conus nussatella	Late Pleistocene	IP1347	Wadi Wizr, Terrace 1	Egypt
557375	Gastropoda	Conus textile neovicarius	Late Pleistocene	IP1347	Wadi Wizr, Terrace 1	Egypt
557376	Gastropoda		Late Pleistocene	IP1347	Wadi Wizr, Terrace 1	Egypt
557377	Gastropoda	Nerita	Late Pleistocene	IP1347	Wadi Wizr, Terrace 1	Egypt
557378	Gastropoda	Nerita	Late Pleistocene	IP1347	Wadi Wizr, Terrace 1	Egypt
557379	Gastropoda		Late Pleistocene	IP1347	Wadi Wizr, Terrace 1	Egypt
557380	Gastropoda	Canarium erythrinum	Late Pleistocene	IP1347	Wadi Wizr, Terrace 1	Egypt
557381	Gastropoda	Monoplex aquatilis	Late Pleistocene	IP1347	Wadi Wizr, Terrace 1	Egypt
557382	Gastropoda	Casmaria erinaceus	Late Pleistocene	IP1347	Wadi Wizr, Terrace 1	Egypt
557383	Gastropoda	Mitra bovei	Late Pleistocene	IP1347	Wadi Wizr, Terrace 1	Egypt
557384	Gastropoda		Late Pleistocene	IP1347	Wadi Wizr, Terrace 1	Egypt
557385	Gastropoda	Vasum turbinellus	Late Pleistocene	IP1347	Wadi Wizr, Terrace 1	Egypt
557386	Gastropoda	Pustularia cicercula	Late Pleistocene	IP1347	Wadi Wizr, Terrace 1	Egypt
557387	Gastropoda	Nassarius	Late Pleistocene	IP1347	Wadi Wizr, Terrace 1	Egypt
557388	Gastropoda	Conomurex fasciatus	Late Pleistocene	IP1347	Wadi Wizr, Terrace 1	Egypt
557389	Gastropoda		Late Pleistocene	IP1347	Wadi Wizr, Terrace 1	Egypt
557390	Gastropoda		Late Pleistocene	IP1347	Wadi Wizr, Terrace 1	Egypt
557391	Bivalvia	Tridacna	Late Pleistocene	IP1349	Wadi Wizr, Terrace 3	Egypt
